# Supplementary material
Source: Springer Nature journal article supplement (https://www.springermedizin.de/resource/supplementary/12913_2007_722_MOESM1_ESM.pdf/9535396)

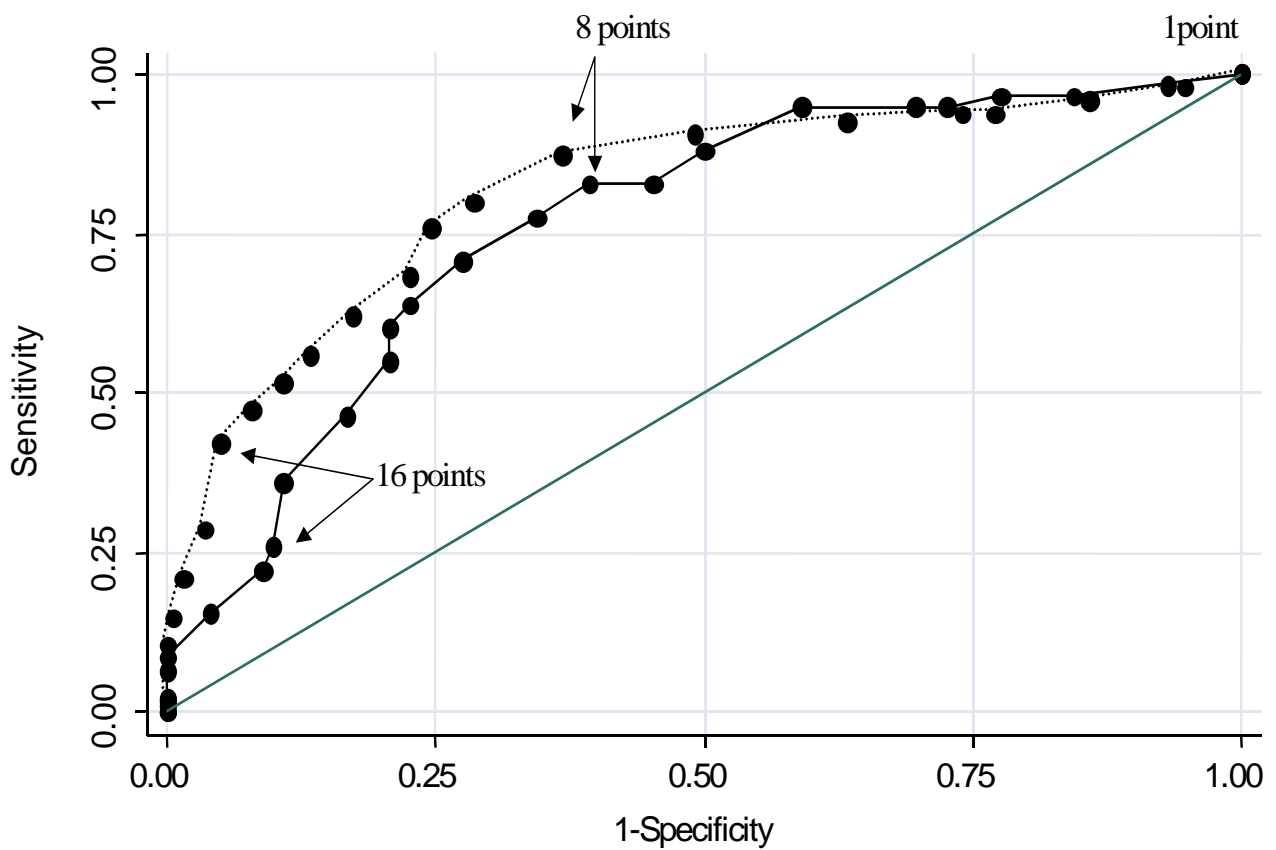

● Derivation cohort ROC area: 0.82  
● Validation cohort ROC area: 0.77

Supplement: MOESM1 [file 9535396]
